# Supplementary material
Source: publisher figshare collection journal article supplement (https://gsapubs.figshare.com/ndownloader/files/22151328)
Supplement: Supplementary file 1 [file 22151328]

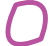

Eroded volcano or crater

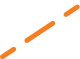

Trend of foliation in Precambrian gneisses

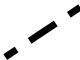

Trend of bedding, layering or foliation

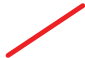

Dike

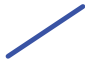

Normal fault
